# Supplementary material
Source: PubMed Central journal article supplement (PMC3778256)
Supplement: NIHMS53693-supplement-Supplementary_Data.pdf [file NIHMS53693-supplement-Supplementary_Data.pdf]

## SUPPLEMENTARY DATA

The antiepileptic drug mephobarbital is not transported by P-glycoprotein or multidrug resistance protein 1 at the blood-brain barrier: a positron emission tomography study

Severin Mairinger Jens P. Bankstahl, Claudia Kuntner, Kerstin Römermann, Marion Bankstahl, Thomas Wanek, Johann Stanek, Wolfgang Löscher, Markus Müller, Thomas Erker, Oliver Langer

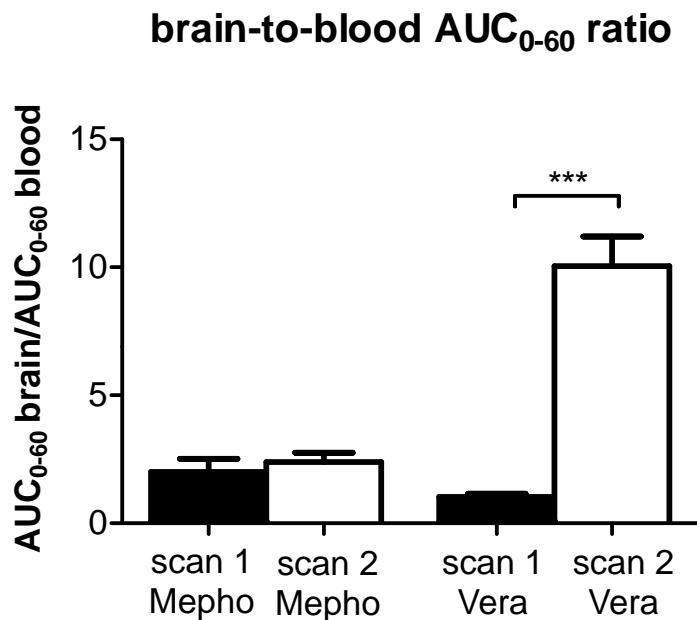

**Supplementary Figure S1.** Comparison of mean ( $\pm$  SD) brain-to-blood AUC<sub>0-60</sub> ratios of [<sup>11</sup>C]mephobarbital (Mepho,  $n = 3$ ) and (*R*)-[<sup>11</sup>C]verapamil (Vera,  $n = 4$ ) in rats in scan 1 (black columns) and scan 2 (white columns) of the paired scan set-up. \*\*\*  $p < 0.001$  (Student's t-test).

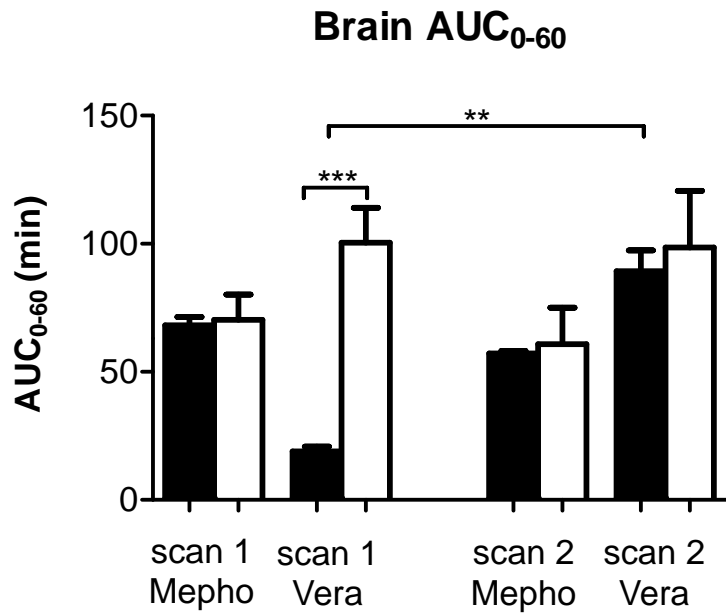

**Supplementary Figure S2.** Comparison of mean ( $\pm$  SD) brain AUC<sub>0-60</sub> values of [<sup>11</sup>C]mephobarbital (Mepho,  $n = 3$ ) and (*R*)-[<sup>11</sup>C]verapamil (Vera,  $n = 3$ ) in wild-type mice (black columns) and *Mdr1a/b*<sup>(-/-)</sup> mice (white columns) in scan 1 and scan 2 of the paired scan set-up. \*\*  $p < 0.01$ , \*\*\*  $p < 0.001$  (Student's t-test).
